# Supplementary material
Source: MDPI journal article supplement (https://www.mdpi.com/2073-4441/14/8/1219)
Supplement: s1 [file s1]

```
#####
# Program: needle
# Rundate: Sun 6 Jun 2021 17:46:06
# Commandline: needle
#   -auto
#   -stdout
#   -asequence emboss_needle-I20210606-174605-0935-46212002-p2m.asequence
#   -bsequence emboss_needle-I20210606-174605-0935-46212002-p2m.bsequence
#   -datafile EBLOSUM62
#   -gapopen 10.0
#   -gapextend 0.5
#   -endopen 10.0
#   -endextend 0.5
#   -aformat3 pair
#   -sprotein1
#   -sprotein2
# Align_format: pair
# Report_file: stdout
#####

#=====
#
# Aligned_sequences: 2
# 1: linC
# 2: MAE_33900
# Matrix: EBLOSUM62
# Gap_penalty: 10.0
# Extend_penalty: 0.5
#
# Length: 262
# Identity:      90/262 (34.4%)
# Similarity:   131/262 (50.0%)
# Gaps:         20/262 ( 7.6%)
# Score: 346.0
#
#
#=====

linC           1  -----MSDLSGKTIIVTGGGSGIGRA TVELLVSGANVAVADI-NDEA           42
                ...|...|...|...|...|...|...|...|...|...|...|...|...|...|...|...|
MAE_33900      1  MKLLPAECQHLDKVAIVTGASRGIGKIALELASQGATVVVNYAKSSSA           50

linC           43  GEAVV--AASGGKAAYFRC D I AQEEDVKALVAQT LA AFGGLDGAFNNAA           89
                .:| | | . . :| | | | . . . :| :| :| :| . . | | . | . . | | :| . | | .
MAE_33900      51  ADAVVEEITAAGGKAIALQADVAKSEEV DNLVDSTKEKFGHIDVLVN NAG           100

linC           90  IPQAGLPLAEVSLERFRQSM D INVTGTFLCMKYQILAMIERGTKGSIVNT           139
                | . . . | . | . :| | | :| :| :| :| :| | | | . . . . | :| :| . | . | :| .
MAE_33900     101  ITRDTLML-RMKLEDWQAVI D LNL TGVFLCTRAVSKLMLKQ-KSGRIINI           148

linC          140  ASAAGVVGVP MHGEYVGAKHAVVGLTRVAAADYKGHGIRVNALVPGAVRT           189
                . | . :| :| . | . . . | . . | | | :| :| . | . :| . . | | :| . | . | .
MAE_33900     149  TSVSGLMGNPQGSNYSAAKAGV IGLTKT LAKEFASRGITVNAVAPGF IET           198

linC          190  PMLQRAMDN D AGLPYLNSIHP IGRFSE PHEQAQA A VLLSD-AASFVTG           238
                . | . | . . . . | . | | :| :| :| . | . | . . . :| | :| :| :|
MAE_33900     199  D-----MTHDLKADEILKYI-PLSRYGKPEEVAGMVRFLAADPAAIYISG           242

linC          239  SCLAADGGFTAI           250
                . . . . | | | . . .
MAE_33900     243  QVFNVDGGMVMA           254

#-----
#-----
```
