# Supplementary material
Source: MDPI journal article supplement (https://www.mdpi.com/2073-4441/14/8/1219)
Supplement: s1 [file s1]

```
#####
# Program: needle
# Runday: Sun 6 Jun 2021 17:45:46
# Commandline: needle
# -auto
# -stdout
# -asequence emboss_needle-I20210606-174544-0877-89569905-p2m.asequence
# -bsequence emboss_needle-I20210606-174544-0877-89569905-p2m.bsequence
# -datafile EBLOSUM62
# -gapopen 10.0
# -gapextend 0.5
# -endopen 10.0
# -endextend 0.5
# -aformat3 pair
# -sprotein1
# -sprotein2
# Align_format: pair
# Report_file: stdout
#####

#=====
#
# Aligned_sequences: 2
# 1: linB
# 2: MAE_40040
# Matrix: EBLOSUM62
# Gap_penalty: 10.0
# Extend_penalty: 0.5
#
# Length: 320
# Identity:      84/320 (26.2%)
# Similarity:    132/320 (41.2%)
# Gaps:          55/320 (17.2%)
# Score: 171.0
#
#=====

linB          1 MSLGAKPFGEKKF- IEIKGRRMAYI DEGTGDPI LFQHGNPTSSYLWRNIM          49
               .....| | :| :|. . . . .|. | :|. .|. |. |. :. :|. | :|
MAE_40040     1 ----MLTNFRKFQLEVNIGITINGVKGGRGFPLLLLHGYPQTHQMWHKIV          45

linB          50 PHCAGLGRLIACDLIGMGDS DK--- LDP SGPERYAYAEHRDYLDALWEAL          96
               |. . . . .:| |. |. |. | | | | | | | | | | | | | | | | | | | |
MAE_40040     46 PRLGANFTVIATDLRGYGDS DKPLPLEDSS ---NYCKRVMALDQVLLME          91

linB          97 DLG-DRVVLVVDWGSALGFDWARRHREVRVQGIAYMEA IAMPIEWADFPE          145
               .| | . . . |:| |. |. :. . . .|. . . . |:| :. :. :| | :. | | :. .
MAE_40040     92 KLG YQEFYLIGHDRGARVSHRLALDFPEKVKKLVLLD- IAPTL- -AMYEA          138

linB          146 QDRDLFQAFRSQAGEELVLQDNVFEQVL--PGLIIRPLSEA--EMAA          189
               .| :. . . |:| :. . . . . :| :| :. |. | :| :| :. :| :. :| :. :|
MAE_40040     139 TDKT FATAYYHWF--FLIQSPFPFETLIAANPDYQLQHCLQSWGRDFS A          185

linB          190 YREPFLAAGEARRPTLSWRPQI-PIAGTPADVVAIA-----RDYAGW          230
               :|. |. | | |:| |. |. |. |. |. |. |. |. |. |. |. |. |. |. |. |. |
MAE_40040     186 FTEE--ALGEYQRCF----RDLRTI TATCADYRAAATI DLEHDRQDLDRK          229

linB          231 LSESP I PKLFINAE PGALT TGRMRDFCR TW---PNQ-TEITVAGAHFIQE          276
               :|. |. |. |. :. |. |. |. |. |. |. |. |. |. |. |. |. |. |. |. |
MAE_40040     230 ISS---PLLVLWGEKGF I--ARQYDVIALWQQRANQVTGQAIASGHFLPE          274

linB          277 DSPDEIGAAIAAFVRLRPA          296
               :| :| :| |. |. |. |. |. |
MAE_40040     275 EAPEETGQAIEDFLR-----          289

#-----
#-----
```
