# Supplementary material
Source: MDPI journal article supplement (https://www.mdpi.com/2073-4441/14/8/1219)
Supplement: s1 [file s1]

**Table S1.** Primers used in Real-Time PCR analyses.

| <b>Primer</b>   | <b>Sequence (5' - 3')</b> | <b>Purpose</b> |
|-----------------|---------------------------|----------------|
| <b>16S for</b>  | CCCGGCCTCAGTTCAGATT       | 16S rRNA       |
| <b>16S rev</b>  | CGGCGATTACTAGCGATTCC      | (MAE_r008)     |
| <b>linC for</b> | CCGGAATGGTGC GTTTTTT      | <i>linC</i>    |
| <b>linC rev</b> | CACCATCGACGTTAAAGACTTGAC  | (MAE_33900)    |
| <b>prxA for</b> | GATGTGGCCTATCCGTTGGT      | <i>prxA</i>    |
| <b>prxA rev</b> | CGCATCAGGATCAAGAACATTG    | (MAE_35830)    |

\* Primer pairs for each gene were designed using Primer Express Software Version 3.0 (Applied Biosystems)
